# Supplementary material
Source: PubMed Central journal article supplement (PMC4754791)
Supplement: NIHMS651524-supplement-Supplemental_Table_1.pdf [file NIHMS651524-supplement-Supplemental_Table_1.pdf]

**Supplementary Table 1.** Multivariable linear regression for percent change in height-indexed LV mass and percent change in LV mass-to-volume ratio between Exam 1 and Exam 5 (where a negative effect estimate indicates lower LV mass or mass-to-volume ratio at Exam 5 versus Exam 1), including estimates of changes in fat mass. Abbreviations:  $\Delta$  = change; Ref = referent category.

| Parameter                                    | % Change in LV Mass Index<br>(Height <sup>2.7</sup> ) |                   |         | % Change in LV Mass/Volume Ratio |                    |         |
|----------------------------------------------|-------------------------------------------------------|-------------------|---------|----------------------------------|--------------------|---------|
|                                              | Estimate                                              | 95% CI            | P-Value | Estimate                         | 95% CI             | P-Value |
| Age, y                                       | -0.07                                                 | (-0.14 to -0.01)  | 0.04    | 0.2                              | (0.09 to 0.31)     | 0.0002  |
| Female Gender                                | -9.04                                                 | (-10.27 to -7.81) | <0.0001 | -8.38                            | (-10.25 to -6.51)  | <0.0001 |
| <b>Race</b>                                  |                                                       |                   |         |                                  |                    |         |
| White                                        | Ref                                                   | Ref               | Ref     | Ref                              | Ref                | Ref     |
| Chinese-American                             | 1.47                                                  | (-0.34 to 3.29)   | 0.11    | -0.02                            | (-2.77 to 2.74)    | 0.99    |
| African-American                             | 2.27                                                  | (0.84 to 3.71)    | 0.002   | 2.94                             | (0.75 to 5.13)     | 0.009   |
| Hispanic                                     | 0.54                                                  | (-1.12 to 2.2)    | 0.52    | 0.3                              | (-2.19 to 2.78)    | 0.82    |
| Smoking                                      | -0.94                                                 | (-2.03 to 0.16)   | 0.09    | 2.26                             | (0.6 to 3.92)      | 0.008   |
| Income                                       | -0.16                                                 | (-0.36 to 0.04)   | 0.11    | -0.04                            | (-0.34 to 0.26)    | 0.79    |
| Education                                    | -0.11                                                 | (-0.39 to 0.17)   | 0.46    | -0.63                            | (-1.06 to -0.2)    | 0.004   |
| Body mass index, log-transformed             | 29.64                                                 | (22.5 to 36.77)   | <0.0001 | 8.09                             | (-2.04 to 18.23)   | 0.12    |
| <b>Glycemic Control</b>                      |                                                       |                   |         |                                  |                    |         |
| Normal fasting glucose                       | Ref                                                   | Ref               | Ref     | Ref                              | Ref                | Ref     |
| Impaired fasting glucose                     | -0.75                                                 | (-2.52 to 1.02)   | 0.41    | 1.85                             | (-0.84 to 4.55)    | 0.18    |
| Untreated diabetes                           | -2.27                                                 | (-6.62 to 2.08)   | 0.31    | 6.42                             | (-0.18 to 13.03)   | 0.06    |
| Treated diabetes                             | 0.98                                                  | (-1.27 to 3.23)   | 0.39    | 3.53                             | (0.11 to 6.95)     | 0.04    |
| $\Delta$ in Glycemic Category                | -0.19                                                 | (-0.91 to 0.53)   | 0.61    | 0.6                              | (-0.5 to 1.7)      | 0.29    |
| Hypertension Stage                           | 2.77                                                  | (2.21 to 3.33)    | <0.0001 | 2.74                             | (1.9 to 3.57)      | <0.0001 |
| $\Delta$ in Hypertension Stage               | 2.95                                                  | (2.49 to 3.41)    | <0.0001 | 2.46                             | (1.76 to 3.16)     | <0.0001 |
| # of Antihypertensive Rx Classes             | 0.24                                                  | (-0.4 to 0.89)    | 0.46    | -1.24                            | (-2.21 to -0.27)   | 0.01    |
| $\Delta$ in # of Antihypertensive Rx Classes | -0.08                                                 | (-0.69 to 0.52)   | 0.78    | -0.63                            | (-1.56 to 0.29)    | 0.18    |
| C-reactive protein, log-transformed          | -0.38                                                 | (-0.91 to 0.15)   | 0.16    | 0.25                             | (-0.55 to 1.06)    | 0.54    |
| Waist Circumference, cm                      | 0.01                                                  | (-0.08 to 0.09)   | 0.89    | 0.2                              | (0.07 to 0.32)     | 0.002   |
| Exercise (per 1000 MET*min/week)             | 0.17                                                  | (-0.05 to 0.39)   | 0.14    | 0.12                             | (-0.22 to 0.45)    | 0.49    |
| LV mass/height <sup>2.7</sup> , Exam 1       | -1.3                                                  | (-1.42 to -1.18)  | <0.0001 |                                  |                    |         |
| LV mass to volume ratio, Exam 1              |                                                       |                   |         | -63.82                           | (-69.27 to -58.37) | <0.0001 |
| Change in Fat Mass (per 10% decrease)        | -1.25                                                 | (-1.55 to -0.96)  | <0.0001 | -1.07                            | (-1.52 to -0.63)   | <0.0001 |
